# Supplementary material for: Neonatal Rat Glia Cultured in Physiological Normoxia for Modeling Neuropathological Conditions In Vitro
Source: MDPI journal article supplement (doi:10.3390/ijms23116000), 2022-05-26
Supplement: s1 [file s1]

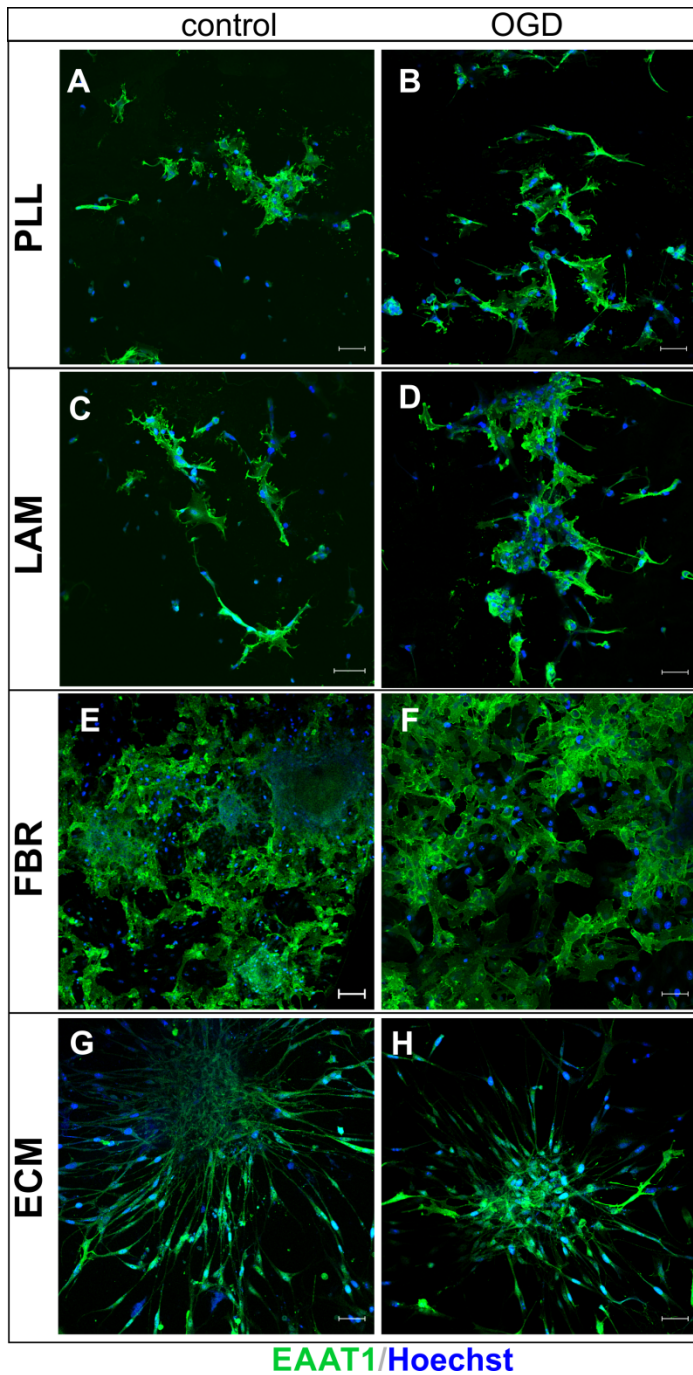

**Figure S1.** Expression of EAAT1 marker in neonatal rat astrocytes cultured on surfaces coated either with PLL (**A, B**), Laminin (**C, D**), Fibronectin (**E, F**) or ECM gel (**G, H**). Cell nuclei are stained with Hoechst dye (blue). The scale bar represents 50  $\mu$ m.
